# Supplementary material for: Severity of hypothyroidism is inversely associated with impaired quality of life in patients referred to an endocrine clinic
Source: Springer Nature journal article supplement (doi:10.1186/s13044-023-00178-0), 2023-09-01
Supplement: MOESM1 [file 13044_2023_178_MOESM1_ESM.pdf]

# Quality of Life Questionnaire for Patients with Thyroid Disease

-ThyPROus-

This questionnaire is about how your thyroid disease has affected your life.

**Please answer each question by marking ☐ by the answer that best fits you. If you are unsure about how you want to answer, please give the best answer you can.**

The first section of the questionnaire is about symptoms, tiredness, memory, mood, and health.

Please base your **answers on how you have been feeling in general** during the past 4 weeks.

# 1. *The first questions are about symptoms*

| During the past 4 weeks have you |                                                                   | Not at<br>all            | A little                 | Some                     | Quite a<br>bit           | Very<br>much             |
|----------------------------------|-------------------------------------------------------------------|--------------------------|--------------------------|--------------------------|--------------------------|--------------------------|
|                                  |                                                                   | ▼                        | ▼                        | ▼                        | ▼                        | ▼                        |
| 1a                               | - had the sensation of fullness in the neck?.....                 | <input type="checkbox"/> | <input type="checkbox"/> | <input type="checkbox"/> | <input type="checkbox"/> | <input type="checkbox"/> |
| 1b                               | - had a <u>visible</u> swelling in the front of your neck?..      | <input type="checkbox"/> | <input type="checkbox"/> | <input type="checkbox"/> | <input type="checkbox"/> | <input type="checkbox"/> |
| 1c                               | - felt pressure in your throat?.....                              | <input type="checkbox"/> | <input type="checkbox"/> | <input type="checkbox"/> | <input type="checkbox"/> | <input type="checkbox"/> |
| 1d                               | - had pain in the front of your throat? .....                     | <input type="checkbox"/> | <input type="checkbox"/> | <input type="checkbox"/> | <input type="checkbox"/> | <input type="checkbox"/> |
| 1e                               | - had pain in your neck that could be felt in<br>your ears? ..... | <input type="checkbox"/> | <input type="checkbox"/> | <input type="checkbox"/> | <input type="checkbox"/> | <input type="checkbox"/> |
| 1f                               | - had the sensation of a lump in your throat? .....               | <input type="checkbox"/> | <input type="checkbox"/> | <input type="checkbox"/> | <input type="checkbox"/> | <input type="checkbox"/> |
| 1g                               | - had the need to clear your throat frequently?.....              | <input type="checkbox"/> | <input type="checkbox"/> | <input type="checkbox"/> | <input type="checkbox"/> | <input type="checkbox"/> |
| 1h                               | - felt discomfort swallowing? .....                               | <input type="checkbox"/> | <input type="checkbox"/> | <input type="checkbox"/> | <input type="checkbox"/> | <input type="checkbox"/> |
| 1i                               | - had difficulty swallowing?.....                                 | <input type="checkbox"/> | <input type="checkbox"/> | <input type="checkbox"/> | <input type="checkbox"/> | <input type="checkbox"/> |
| 1j                               | - had the sensation of suffocating? .....                         | <input type="checkbox"/> | <input type="checkbox"/> | <input type="checkbox"/> | <input type="checkbox"/> | <input type="checkbox"/> |
| 1k                               | - been hoarse?.....                                               | <input type="checkbox"/> | <input type="checkbox"/> | <input type="checkbox"/> | <input type="checkbox"/> | <input type="checkbox"/> |
| 1l                               | - had trembling hands? .....                                      | <input type="checkbox"/> | <input type="checkbox"/> | <input type="checkbox"/> | <input type="checkbox"/> | <input type="checkbox"/> |
| 1m                               | - had a tendency to sweat a lot? .....                            | <input type="checkbox"/> | <input type="checkbox"/> | <input type="checkbox"/> | <input type="checkbox"/> | <input type="checkbox"/> |
| 1n                               | - experienced palpitations (rapid heart beat)? .....              | <input type="checkbox"/> | <input type="checkbox"/> | <input type="checkbox"/> | <input type="checkbox"/> | <input type="checkbox"/> |
| 1o                               | - experienced shortness of breath?.....                           | <input type="checkbox"/> | <input type="checkbox"/> | <input type="checkbox"/> | <input type="checkbox"/> | <input type="checkbox"/> |
| 1p                               | - been sensitive to heat? .....                                   | <input type="checkbox"/> | <input type="checkbox"/> | <input type="checkbox"/> | <input type="checkbox"/> | <input type="checkbox"/> |
| 1q                               | - been sensitive to cold? .....                                   | <input type="checkbox"/> | <input type="checkbox"/> | <input type="checkbox"/> | <input type="checkbox"/> | <input type="checkbox"/> |
| 1r                               | - had an increased appetite?.....                                 | <input type="checkbox"/> | <input type="checkbox"/> | <input type="checkbox"/> | <input type="checkbox"/> | <input type="checkbox"/> |

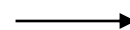

| During the past 4 weeks have you |                                                                      | Not at<br>all            | A little                 | Some                     | Quite a<br>bit           | Very<br>much             |
|----------------------------------|----------------------------------------------------------------------|--------------------------|--------------------------|--------------------------|--------------------------|--------------------------|
|                                  |                                                                      | ▼                        | ▼                        | ▼                        | ▼                        | ▼                        |
| 1s                               | - had loose stools? .....                                            | <input type="checkbox"/> | <input type="checkbox"/> | <input type="checkbox"/> | <input type="checkbox"/> | <input type="checkbox"/> |
| 1t                               | - had an upset stomach? .....                                        | <input type="checkbox"/> | <input type="checkbox"/> | <input type="checkbox"/> | <input type="checkbox"/> | <input type="checkbox"/> |
| 1u                               | - had moist or watery eyes? .....                                    | <input type="checkbox"/> | <input type="checkbox"/> | <input type="checkbox"/> | <input type="checkbox"/> | <input type="checkbox"/> |
| 1v                               | - had bags under the eyes or swollen eyelids? .....                  | <input type="checkbox"/> | <input type="checkbox"/> | <input type="checkbox"/> | <input type="checkbox"/> | <input type="checkbox"/> |
| 1w                               | - had the sensation of dryness or “grittiness”<br>in the eyes? ..... | <input type="checkbox"/> | <input type="checkbox"/> | <input type="checkbox"/> | <input type="checkbox"/> | <input type="checkbox"/> |
| 1x                               | - had impaired vision? .....                                         | <input type="checkbox"/> | <input type="checkbox"/> | <input type="checkbox"/> | <input type="checkbox"/> | <input type="checkbox"/> |
| 1y                               | - felt pressure in (or behind) the eyes? .....                       | <input type="checkbox"/> | <input type="checkbox"/> | <input type="checkbox"/> | <input type="checkbox"/> | <input type="checkbox"/> |
| 1z                               | - had double vision? .....                                           | <input type="checkbox"/> | <input type="checkbox"/> | <input type="checkbox"/> | <input type="checkbox"/> | <input type="checkbox"/> |
| 1aa                              | - had eye pain? .....                                                | <input type="checkbox"/> | <input type="checkbox"/> | <input type="checkbox"/> | <input type="checkbox"/> | <input type="checkbox"/> |
| 1bb                              | - been very sensitive to light? .....                                | <input type="checkbox"/> | <input type="checkbox"/> | <input type="checkbox"/> | <input type="checkbox"/> | <input type="checkbox"/> |
| 1cc                              | - had swollen hands or feet? .....                                   | <input type="checkbox"/> | <input type="checkbox"/> | <input type="checkbox"/> | <input type="checkbox"/> | <input type="checkbox"/> |
| 1dd                              | - had dry skin? .....                                                | <input type="checkbox"/> | <input type="checkbox"/> | <input type="checkbox"/> | <input type="checkbox"/> | <input type="checkbox"/> |
| 1ee                              | - had itchy skin? .....                                              | <input type="checkbox"/> | <input type="checkbox"/> | <input type="checkbox"/> | <input type="checkbox"/> | <input type="checkbox"/> |

## 2. The following questions are about tiredness

| During the past 4 weeks have you |                                                                    | Not at<br>all            | A little                 | Some                     | Quite a<br>bit           | Very<br>much             |
|----------------------------------|--------------------------------------------------------------------|--------------------------|--------------------------|--------------------------|--------------------------|--------------------------|
|                                  |                                                                    | ▼                        | ▼                        | ▼                        | ▼                        | ▼                        |
| 2a                               | - been tired? .....                                                | <input type="checkbox"/> | <input type="checkbox"/> | <input type="checkbox"/> | <input type="checkbox"/> | <input type="checkbox"/> |
| 2b                               | - been exhausted? .....                                            | <input type="checkbox"/> | <input type="checkbox"/> | <input type="checkbox"/> | <input type="checkbox"/> | <input type="checkbox"/> |
| 2c                               | - had difficulty getting motivated to do<br>anything at all? ..... | <input type="checkbox"/> | <input type="checkbox"/> | <input type="checkbox"/> | <input type="checkbox"/> | <input type="checkbox"/> |
| 2d                               | - felt worn out? .....                                             | <input type="checkbox"/> | <input type="checkbox"/> | <input type="checkbox"/> | <input type="checkbox"/> | <input type="checkbox"/> |

### 3. *The following questions are about your vitality*

**During the past 4 weeks have you**

| Not at<br>all            | A little                 | Some                     | Quite a<br>bit           | Very<br>much             |
|--------------------------|--------------------------|--------------------------|--------------------------|--------------------------|
| ▼                        | ▼                        | ▼                        | ▼                        | ▼                        |
| <input type="checkbox"/> | <input type="checkbox"/> | <input type="checkbox"/> | <input type="checkbox"/> | <input type="checkbox"/> |
| <input type="checkbox"/> | <input type="checkbox"/> | <input type="checkbox"/> | <input type="checkbox"/> | <input type="checkbox"/> |
| <input type="checkbox"/> | <input type="checkbox"/> | <input type="checkbox"/> | <input type="checkbox"/> | <input type="checkbox"/> |

- 3a - felt full of life? .....
- 3b - felt energetic? .....
- 3c - been able to cope with the demands of  
your life? .....

### 4. *The following questions are about memory and concentration*

**During the past 4 weeks have you**

| Not at<br>all            | A little                 | Some                     | Quite a<br>bit           | Very<br>much             |
|--------------------------|--------------------------|--------------------------|--------------------------|--------------------------|
| ▼                        | ▼                        | ▼                        | ▼                        | ▼                        |
| <input type="checkbox"/> | <input type="checkbox"/> | <input type="checkbox"/> | <input type="checkbox"/> | <input type="checkbox"/> |
| <input type="checkbox"/> | <input type="checkbox"/> | <input type="checkbox"/> | <input type="checkbox"/> | <input type="checkbox"/> |
| <input type="checkbox"/> | <input type="checkbox"/> | <input type="checkbox"/> | <input type="checkbox"/> | <input type="checkbox"/> |
| <input type="checkbox"/> | <input type="checkbox"/> | <input type="checkbox"/> | <input type="checkbox"/> | <input type="checkbox"/> |
| <input type="checkbox"/> | <input type="checkbox"/> | <input type="checkbox"/> | <input type="checkbox"/> | <input type="checkbox"/> |

- 4a - had difficulty remembering? .....
- 4b - had slow or unclear thinking? .....
- 4c - had difficulty finding the right words? .....
- 4d - been confused? .....
- 4e - had difficulty learning something new? .....
- 4f - had difficulty concentrating? .....

**5. The following questions are about nervousness and tension**

| During the past 4 weeks have you |                                                  | Not at<br>all            | A little                 | Some                     | Quite a<br>bit           | Very<br>much             |
|----------------------------------|--------------------------------------------------|--------------------------|--------------------------|--------------------------|--------------------------|--------------------------|
|                                  |                                                  | ▼                        | ▼                        | ▼                        | ▼                        | ▼                        |
| 5a                               | - felt nervous?.....                             | <input type="checkbox"/> | <input type="checkbox"/> | <input type="checkbox"/> | <input type="checkbox"/> | <input type="checkbox"/> |
| 5b                               | - felt afraid or anxious? .....                  | <input type="checkbox"/> | <input type="checkbox"/> | <input type="checkbox"/> | <input type="checkbox"/> | <input type="checkbox"/> |
| 5c                               | - felt tense? .....                              | <input type="checkbox"/> | <input type="checkbox"/> | <input type="checkbox"/> | <input type="checkbox"/> | <input type="checkbox"/> |
| 5d                               | - been concerned about being seriously ill?..... | <input type="checkbox"/> | <input type="checkbox"/> | <input type="checkbox"/> | <input type="checkbox"/> | <input type="checkbox"/> |
| 5e                               | - felt uneasy?.....                              | <input type="checkbox"/> | <input type="checkbox"/> | <input type="checkbox"/> | <input type="checkbox"/> | <input type="checkbox"/> |
| 5f                               | - felt restless?.....                            | <input type="checkbox"/> | <input type="checkbox"/> | <input type="checkbox"/> | <input type="checkbox"/> | <input type="checkbox"/> |

**6. The following questions are about psychological well-being**

| During the past 4 weeks have you |                           | Not at<br>all            | A little                 | Some                     | Quite a<br>bit           | Very<br>much             |
|----------------------------------|---------------------------|--------------------------|--------------------------|--------------------------|--------------------------|--------------------------|
|                                  |                           | ▼                        | ▼                        | ▼                        | ▼                        | ▼                        |
| 6a                               | - felt sad?.....          | <input type="checkbox"/> | <input type="checkbox"/> | <input type="checkbox"/> | <input type="checkbox"/> | <input type="checkbox"/> |
| 6b                               | - felt depressed?.....    | <input type="checkbox"/> | <input type="checkbox"/> | <input type="checkbox"/> | <input type="checkbox"/> | <input type="checkbox"/> |
| 6c                               | - felt discouraged? ..... | <input type="checkbox"/> | <input type="checkbox"/> | <input type="checkbox"/> | <input type="checkbox"/> | <input type="checkbox"/> |
| 6d                               | - cried easily?.....      | <input type="checkbox"/> | <input type="checkbox"/> | <input type="checkbox"/> | <input type="checkbox"/> | <input type="checkbox"/> |
| 6e                               | - felt unhappy? .....     | <input type="checkbox"/> | <input type="checkbox"/> | <input type="checkbox"/> | <input type="checkbox"/> | <input type="checkbox"/> |

| During the past 4 weeks have you |                              | Not at<br>all            | A little                 | Some                     | Quite a<br>bit           | Very<br>much             |
|----------------------------------|------------------------------|--------------------------|--------------------------|--------------------------|--------------------------|--------------------------|
|                                  |                              | ▼                        | ▼                        | ▼                        | ▼                        | ▼                        |
| 6f                               | - felt happy?.....           | <input type="checkbox"/> | <input type="checkbox"/> | <input type="checkbox"/> | <input type="checkbox"/> | <input type="checkbox"/> |
| 6g                               | - had self-confidence? ..... | <input type="checkbox"/> | <input type="checkbox"/> | <input type="checkbox"/> | <input type="checkbox"/> | <input type="checkbox"/> |

**7. The following questions are about having difficulty coping or having mood swings**

**During the past 4 weeks have you**

|                                             | Not at<br>all            | A little                 | Some                     | Quite a<br>bit           | Very<br>much             |
|---------------------------------------------|--------------------------|--------------------------|--------------------------|--------------------------|--------------------------|
| 7a - had difficulty coping? .....           | <input type="checkbox"/> | <input type="checkbox"/> | <input type="checkbox"/> | <input type="checkbox"/> | <input type="checkbox"/> |
| 7b - felt “not like yourself”? .....        | <input type="checkbox"/> | <input type="checkbox"/> | <input type="checkbox"/> | <input type="checkbox"/> | <input type="checkbox"/> |
| 7c - noticed you easily felt stressed?..... | <input type="checkbox"/> | <input type="checkbox"/> | <input type="checkbox"/> | <input type="checkbox"/> | <input type="checkbox"/> |
| 7d - had mood swings? .....                 | <input type="checkbox"/> | <input type="checkbox"/> | <input type="checkbox"/> | <input type="checkbox"/> | <input type="checkbox"/> |
| 7e - felt irritable?.....                   | <input type="checkbox"/> | <input type="checkbox"/> | <input type="checkbox"/> | <input type="checkbox"/> | <input type="checkbox"/> |
| 7f - felt frustrated? .....                 | <input type="checkbox"/> | <input type="checkbox"/> | <input type="checkbox"/> | <input type="checkbox"/> | <input type="checkbox"/> |
| 7g - felt angry? .....                      | <input type="checkbox"/> | <input type="checkbox"/> | <input type="checkbox"/> | <input type="checkbox"/> | <input type="checkbox"/> |

|                                          | Not at<br>all            | A little                 | Some                     | Quite a<br>bit           | Com-<br>pletely          |
|------------------------------------------|--------------------------|--------------------------|--------------------------|--------------------------|--------------------------|
| 7h - felt in control of your life? ..... | <input type="checkbox"/> | <input type="checkbox"/> | <input type="checkbox"/> | <input type="checkbox"/> | <input type="checkbox"/> |
| 7i - felt in balance? .....              | <input type="checkbox"/> | <input type="checkbox"/> | <input type="checkbox"/> | <input type="checkbox"/> | <input type="checkbox"/> |

The remainder of the questionnaire is about **how your thyroid disease may have affected various aspects of your life**

**8. The following questions are about your relationships with other people**

**During the past 4 weeks, has your thyroid disease caused you to**

|               |          |      |                |              |
|---------------|----------|------|----------------|--------------|
| Not at<br>all | A little | Some | Quite a<br>bit | Very<br>much |
|---------------|----------|------|----------------|--------------|

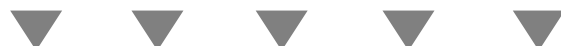

8a - have difficulty being together with other people  
(for example, spouse, children, boy/girlfriend,  
friends, or others)?..... ☐ ..... ☐ ..... ☐ ..... ☐ ..... ☐

8b - feel you were a burden to other people?..... ☐ ..... ☐ ..... ☐ ..... ☐ ..... ☐

8c - have conflicts with other people?..... ☐ ..... ☐ ..... ☐ ..... ☐ ..... ☐

**During the past 4 weeks have you**

|               |          |      |                |              |
|---------------|----------|------|----------------|--------------|
| Not at<br>all | A little | Some | Quite a<br>bit | Very<br>much |
|---------------|----------|------|----------------|--------------|

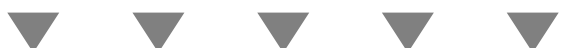

8d - felt that people in your surroundings  
have lacked understanding of your thyroid  
disease?..... ☐ ..... ☐ ..... ☐ ..... ☐ ..... ☐

**9. The following questions are about your daily activities**

**During the past 4 weeks, has your thyroid disease caused you to**

| Not at all | A little | Some | Quite a bit | Very much |
|------------|----------|------|-------------|-----------|
| ▼          | ▼        | ▼    | ▼           | ▼         |

- |    |                                                                                                            |                          |                          |                          |                          |                          |
|----|------------------------------------------------------------------------------------------------------------|--------------------------|--------------------------|--------------------------|--------------------------|--------------------------|
| 9a | - have difficulty managing your daily life? .....                                                          | <input type="checkbox"/> | <input type="checkbox"/> | <input type="checkbox"/> | <input type="checkbox"/> | <input type="checkbox"/> |
| 9b | - limit your leisure activities or hobbies?.....                                                           | <input type="checkbox"/> | <input type="checkbox"/> | <input type="checkbox"/> | <input type="checkbox"/> | <input type="checkbox"/> |
| 9c | - not be able to participate in life around you? .....                                                     | <input type="checkbox"/> | <input type="checkbox"/> | <input type="checkbox"/> | <input type="checkbox"/> | <input type="checkbox"/> |
| 9d | - have difficulty getting around<br>(for example, walking, running, bicycling,<br>or driving a car)? ..... | <input type="checkbox"/> | <input type="checkbox"/> | <input type="checkbox"/> | <input type="checkbox"/> | <input type="checkbox"/> |
| 9e | - feel as if everything takes longer to do? .....                                                          | <input type="checkbox"/> | <input type="checkbox"/> | <input type="checkbox"/> | <input type="checkbox"/> | <input type="checkbox"/> |

**During the past 4 weeks, has your thyroid disease caused you to**

| I do not work | Not at all | A little | Some | Quite a bit | Very much |
|---------------|------------|----------|------|-------------|-----------|
| ▼             | ▼          | ▼        | ▼    | ▼           | ▼         |

- |    |                                                                                                             |                          |                          |                          |                          |                          |
|----|-------------------------------------------------------------------------------------------------------------|--------------------------|--------------------------|--------------------------|--------------------------|--------------------------|
| 9f | - have <u>difficulty managing your job</u> (for example, finding it hard to cope or calling in sick)? ..... | <input type="checkbox"/> | <input type="checkbox"/> | <input type="checkbox"/> | <input type="checkbox"/> | <input type="checkbox"/> |
|----|-------------------------------------------------------------------------------------------------------------|--------------------------|--------------------------|--------------------------|--------------------------|--------------------------|



**10. The following questions are about your sex life**

**During the past 4 weeks have you**

| Not at all | A little | Some | Quite a bit | Very much |
|------------|----------|------|-------------|-----------|
|------------|----------|------|-------------|-----------|

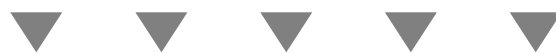

10a - felt your thyroid disease had a negative influence on your sex life? ..... ☐ ..... ☐ ..... ☐ ..... ☐ ..... ☐

10b - had a decreased sexual desire? ..... ☐ ..... ☐ ..... ☐ ..... ☐ ..... ☐

**11. Thyroid diseases (or their treatment) may affect your appearance. (For example, by causing swelling of the neck, swollen face, hands, or feet, or changes in weight or to the eyes.)**

**During the past 4 weeks,**

| Not at all | A little | Some | Quite a bit | Very much |
|------------|----------|------|-------------|-----------|
|------------|----------|------|-------------|-----------|

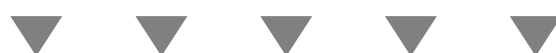

11a - has your thyroid disease affected your appearance (for example, swelling of the neck, eye changes, weight changes)? ..... ☐ ..... ☐ ..... ☐ ..... ☐ ..... ☐

11b - have you been unsatisfied with your appearance because of your thyroid disease? ..... ☐ ..... ☐ ..... ☐ ..... ☐ ..... ☐

11c - have you tried to camouflage or mask visible signs of your thyroid disease (for example, by wearing a scarf or sunglasses)? ..... ☐ ..... ☐ ..... ☐ ..... ☐ ..... ☐

11d - have you been bothered by other people looking at you? ..... ☐ ..... ☐ ..... ☐ ..... ☐ ..... ☐

11e - has your thyroid disease influenced which clothes you wear? ..... ☐ ..... ☐ ..... ☐ ..... ☐ ..... ☐

11f - has your thyroid disease made you feel too fat? ..... ☐ ..... ☐ ..... ☐ ..... ☐ ..... ☐

**12. The final question is about to what extent your thyroid disease has affected you overall during the past 4 weeks**

**During the past 4 weeks,**

| Not at<br>all | A little | Some | Quite a<br>bit | Very<br>much |
|---------------|----------|------|----------------|--------------|
| ▼             | ▼        | ▼    | ▼              | ▼            |

12

- has your thyroid disease had a negative  
effect on your quality of life? .....

|                          |       |                          |       |                          |       |                          |       |                          |
|--------------------------|-------|--------------------------|-------|--------------------------|-------|--------------------------|-------|--------------------------|
| <input type="checkbox"/> | ..... | <input type="checkbox"/> | ..... | <input type="checkbox"/> | ..... | <input type="checkbox"/> | ..... | <input type="checkbox"/> |
|--------------------------|-------|--------------------------|-------|--------------------------|-------|--------------------------|-------|--------------------------|

*Please go back and check that you have answered all the questions.*

***Thank you very much for your help answering this questionnaire!***
